# Supplementary material for: Characterization of Mutations in the Mitochondrial Encoded Electron Transport Chain Complexes in Acute Myeloid Leukemia
Source: PubMed Central journal article supplement (PMC6125587; doi:10.1038/s41598-018-31489-0), 2018-09-05
Supplement: 41598_2018_31489_MOESM1_ESM.pdf [file 41598_2018_31489_MOESM1_ESM.pdf]

## **Characterization of Mutations in the Mitochondrial Encoded Electron Transport Chain Complexes in Acute Myeloid Leukemia**

Sharon Wu<sup>1</sup>, Mojtaba Akhtari<sup>2</sup>, Houda Alachkar\*<sup>1,2</sup>

<sup>1</sup>USC School of Pharmacy, University of Southern California, Los Angeles, CA

<sup>2</sup>Norris Comprehensive Cancer Center, University of Southern California, Los Angeles, CA

**Table S1.** Clinical characteristics of patients with AML in the TCGA data set with available information on Complex I Mutations. *P-values calculated using non-parametric Mann-Whitney U or Fisher's Exact test. Two patients were missing FAB classification data.*

| <b>Characteristic</b>      | <b>No Mutations<br/>(n=196)</b> | <b>Mutations (n=4)</b> | <b>p-value</b> |
|----------------------------|---------------------------------|------------------------|----------------|
| <b>Age, median (years)</b> | 57                              | 68                     | 0.15           |
| <i>Young (&lt;60)</i>      | 108 (55.1%)                     | 1 (25%)                | 0.33           |
| <i>Old (≥60)</i>           | 88 (44.9%)                      | 3 (75%)                |                |
| <b>Sex</b>                 |                                 |                        | 0.63           |
| Female (n, %)              | 91 (46.4%)                      | 1 (25%)                |                |
| Male (n, %)                | 105 (53.6%)                     | 3 (75%)                |                |
| <b>FAB</b>                 |                                 |                        |                |
| M0 (n, %)                  | 19 (9.74%)                      | 0                      | >0.99          |
| M1 (n, %)                  | 45 (23.1%)                      | 1 (33.3%)              | 0.55           |
| M2 (n, %)                  | 43 (22.1%)                      | 1 (33.3%)              | 0.53           |
| M3 (n, %)                  | 20 (10.3%)                      | 0                      | >0.99          |
| M4 (n, %)                  | 40 (20.5%)                      | 1 (33.3%)              | 0.50           |
| M5 (n, %)                  | 22 (11.3%)                      | 0                      | >0.99          |
| M6 (n, %)                  | 3 (1.54%)                       | 0                      | >0.99          |
| M7 (n, %)                  | 3 (1.54%)                       | 0                      | >0.99          |
| <b>WB Count, median</b>    | 15.6                            | 37.9                   | 0.55           |
| <i>In (WB Count)</i>       | 2.60                            | 3.08                   | 0.56           |
| <b>% BM Blast, median</b>  | 73                              | 72.5                   | 0.97           |
| <b>% PB Blast, median</b>  | 35                              | 26                     | 0.45           |
| <b>Risk Status</b>         |                                 |                        |                |
| <i>Poor (n, %)</i>         | 49 (25%)                        | 2 (50%)                | 0.28           |
| <i>Intermediate (n, %)</i> | 104 (53.1%)                     | 2 (50%)                | >0.99          |
| <i>Good (n, %)</i>         | 39 (19.9%)                      | 0                      | 0.59           |
| <b>Cytogenetic Status</b>  |                                 |                        | >0.99          |
| <i>Normal (n, %)</i>       | 90 (47.1%)                      | 2 (50%)                |                |
| <i>Abnormal (n, %)</i>     | 101 (52.9%)                     | 2 (50%)                |                |
| <b>Transplant (Y/N)</b>    |                                 |                        | 0.63           |
| <i>No (n, %)</i>           | 109 (55.6%)                     | 3 (75%)                |                |
| <i>Yes (n, %)</i>          | 87 (44.4%)                      | 1 (25%)                |                |

**Table S2.** Clinical characteristics of patients with AML in the TCGA data set with available information on Complex III Mutations. *P-values calculated using non-parametric Mann-Whitney U or Fisher's Exact test.*

| <b>Characteristic</b>      | <b>No Mutations<br/>(n=197)</b> | <b>Mutations (n=3)</b> | <b>p-value</b> |
|----------------------------|---------------------------------|------------------------|----------------|
| <b>Age, median (years)</b> | 57                              | 65                     | 0.14           |
| <i>Young (&lt;60)</i>      | 109 (55.3%)                     | 0                      | 0.09           |
| <i>Old (≥60)</i>           | 88 (44.7%)                      | 3 (100%)               |                |
| <b>Sex</b>                 |                                 |                        | 0.25           |
| Female (n, %)              | 92 (46.7%)                      | 0                      |                |
| Male (n, %)                | 105 (53.3%)                     | 3 (100%)               |                |
| <b>FAB</b>                 |                                 |                        |                |
| M0 (n, %)                  | 18 (9.23%)                      | 1 (33.3%)              | 0.26           |
| M1 (n, %)                  | 44 (22.6%)                      | 2 (66.7%)              | 0.14           |
| M2 (n, %)                  | 44 (22.6%)                      | 0                      | >0.99          |
| M3 (n, %)                  | 20 (10.3%)                      | 0                      | >0.99          |
| M4 (n, %)                  | 41 (21.0%)                      | 0                      | >0.99          |
| M5 (n, %)                  | 22 (11.3%)                      | 0                      | >0.99          |
| M6 (n, %)                  | 3 (1.54%)                       | 0                      | >0.99          |
| M7 (n, %)                  | 3 (1.54%)                       | 0                      | >0.99          |
| <b>WB Count, median</b>    | 16                              | 48                     | 0.84           |
| <i>In (WB Count)</i>       | 2.61                            | 2.66                   | 0.96           |
| <b>% BM Blast, median</b>  | 72                              | 83                     | 0.30           |
| <b>% PB Blast, median</b>  | 34.5                            | 49                     | 0.91           |
| <b>Risk Status</b>         |                                 |                        |                |
| <i>Poor (n, %)</i>         | 50 (25.4%)                      | 1 (33.3%)              | >0.99          |
| <i>Intermediate (n, %)</i> | 104 (52.8%)                     | 2 (66.7%)              | >0.99          |
| <i>Good (n, %)</i>         | 39 (19.8%)                      | 0                      | >0.99          |
| <b>Cytogenetic Status</b>  |                                 |                        | 0.60           |
| <i>Normal (n, %)</i>       | 90 (46.9%)                      | 2 (66.7%)              |                |
| <i>Abnormal (n, %)</i>     | 102 (53.1%)                     | 1 (33.3%)              |                |
| <b>Transplant (Y/N)</b>    |                                 |                        | 0.58           |
| <i>No (n, %)</i>           | 111 (56.3%)                     | 1 (33.3%)              |                |
| <i>Yes (n, %)</i>          | 86 (43.7%)                      | 2 (66.7%)              |                |

**Table S3.** Clinical characteristics of patients with AML in the TCGA data set with available information on Complex IV Mutations. *P-values calculated using non-parametric Mann-Whitney U or Fisher's Exact test.*

| <b>Characteristic</b>      | <b>No Mutations<br/>(n=191)</b> | <b>Mutations (n=9)</b> | <b>p-value</b> |
|----------------------------|---------------------------------|------------------------|----------------|
| <b>Age, median (years)</b> | 57                              | 72                     | 0.009          |
| <i>Young (&lt;60)</i>      | 107 (56%)                       | 2 (22.2%)              | 0.08           |
| <i>Old (≥60)</i>           | 84 (44%)                        | 7 (77.8%)              |                |
| <b>Sex</b>                 |                                 |                        |                |
| Female (n, %)              | 87 (45.6%)                      | 5 (55.6%)              | 0.74           |
| Male (n, %)                | 104 (54.5%)                     | 4 (44.4%)              |                |
| <b>FAB</b>                 |                                 |                        |                |
| M0 (n, %)                  | 16 (8.47%)                      | 3 (33.3%)              | 0.04           |
| M1 (n, %)                  | 43 (22.8%)                      | 3 (33.3%)              | 0.44           |
| M2 (n, %)                  | 42 (22.2%)                      | 2 (22.2%)              | >0.99          |
| M3 (n, %)                  | 19 (10.1%)                      | 1 (11.1%)              | >0.99          |
| M4 (n, %)                  | 41 (21.7%)                      | 0                      | 0.21           |
| M5 (n, %)                  | 22 (11.6%)                      | 0                      | 0.60           |
| M6 (n, %)                  | 3 (1.59%)                       | 0                      | >0.99          |
| M7 (n, %)                  | 3 (1.59%)                       | 0                      | >0.99          |
| <b>WB Count, median</b>    |                                 |                        |                |
| <i>In (WB Count)</i>       | 16.8                            | 5.4                    | 0.56           |
|                            | 2.63                            | 2.37                   | 0.63           |
| <b>% BM Blast, median</b>  |                                 |                        |                |
|                            | 73                              | 74                     | 0.98           |
| <b>% PB Blast, median</b>  |                                 |                        |                |
|                            | 35                              | 36                     | 0.76           |
| <b>Risk Status</b>         |                                 |                        |                |
| <i>Poor (n, %)</i>         | 46 (24.1%)                      | 5 (55.6%)              | 0.053          |
| <i>Intermediate (n, %)</i> | 103 (53.9%)                     | 3 (33.3%)              | 0.31           |
| <i>Good (n, %)</i>         | 38 (19.9%)                      | 1 (11.1%)              | 0.69           |
| <b>Cytogenetic Status</b>  |                                 |                        |                |
| <i>Normal (n, %)</i>       | 89 (47.9%)                      | 3 (33.3%)              | 0.50           |
| <i>Abnormal (n, %)</i>     | 97 (52.2%)                      | 6 (66.7%)              |                |
| <b>Transplant (Y/N)</b>    |                                 |                        |                |
| <i>No (n, %)</i>           | 106 (55.5%)                     | 6 (66.7%)              | 0.73           |
| <i>Yes (n, %)</i>          | 85 (44.5%)                      | 3 (33.3%)              |                |

**Table S4.** Clinical characteristics of patients with AML in the TCGA data set with available information on mutations in either Complex I or IV. *P-values calculated using non-parametric Mann-Whitney U or Fisher's Exact test.*

| <b>Characteristic</b>      | <b>No Mutations<br/>(n=188)</b> | <b>Mutations (n=12)</b> | <b>p-value</b> |
|----------------------------|---------------------------------|-------------------------|----------------|
| <b>Age, median (years)</b> | 57                              | 71.5                    | 0.008          |
| <i>Young (&lt;60)</i>      | 106 (56.4%)                     | 3 (25%)                 | 0.04           |
| <i>Old (≥60)</i>           | 82 (43.6%)                      | 9 (75%)                 |                |
| <b>Sex</b>                 |                                 |                         | >0.99          |
| Female (n, %)              | 87 (46.3%)                      | 5 (41.7%)               |                |
| Male (n, %)                | 101 (53.7%)                     | 7 (58.3%)               |                |
| <b>FAB</b>                 |                                 |                         |                |
| M0 (n, %)                  | 16 (8.56%)                      | 3 (27.3%)               | 0.08           |
| M1 (n, %)                  | 43 (23%)                        | 3 (27.3%)               | 0.72           |
| M2 (n, %)                  | 41 (21.9%)                      | 3 (27.3%)               | 0.71           |
| M3 (n, %)                  | 19 (10.2%)                      | 1 (9.09%)               | >0.99          |
| M4 (n, %)                  | 40 (21.4%)                      | 1 (9.09%)               | 0.47           |
| M5 (n, %)                  | 22 (11.8%)                      | 0                       | 0.62           |
| M6 (n, %)                  | 3 (1.60%)                       | 0                       | >0.99          |
| M7 (n, %)                  | 3 (1.60%)                       | 0                       | >0.99          |
| <b>WB Count, median</b>    | 16.3                            | 14.5                    | 0.90           |
| <i>In (WB Count)</i>       | 2.61                            | 2.71                    | 0.83           |
| <b>% BM Blast, median</b>  | 72.5                            | 74.5                    | 0.67           |
| <b>% PB Blast, median</b>  | 34.5                            | 52                      | 0.80           |
| <b>Risk Status</b>         |                                 |                         |                |
| <i>Poor (n, %)</i>         | 44 (23.4%)                      | 7 (58.3%)               | 0.015          |
| <i>Intermediate (n, %)</i> | 102 (54.2%)                     | 4 (33.33%)              | 0.15           |
| <i>Good (n, %)</i>         | 38 (20.2%)                      | 1 (8.33%)               | 0.47           |
| <b>Cytogenetic Status</b>  |                                 |                         | 0.38           |
| <i>Normal (n, %)</i>       | 88 (48.1%)                      | 4 (33.3%)               |                |
| <i>Abnormal (n, %)</i>     | 95 (51.9%)                      | 8 (66.7%)               |                |
| <b>Transplant (Y/N)</b>    |                                 |                         | 0.56           |
| <i>No (n, %)</i>           | 104 (55.3%)                     | 8 (66.7%)               |                |
| <i>Yes (n, %)</i>          | 84 (44.7%)                      | 4 (33.3%)               |                |

**Table S5.** Molecular characteristics of patients with AML in the TCGA data set with available information on mutation status in Complex IV. *P-values calculated using non-parametric Mann-Whitney U or Fisher's Exact test.*

| <b>Gene</b>   | <b>No Mutations<br/>(n=191)</b> | <b>Mutations (n=9)</b> | <b>p-value</b> |
|---------------|---------------------------------|------------------------|----------------|
| <i>FLT3</i>   | 55 (28.8%)                      | 1 (11.1%)              | 0.45           |
| <i>TP53</i>   | 13 (6.81%)                      | 3 (33.3%)              | 0.026          |
| <i>DNMT3A</i> | 47 (24.6%)                      | 2 (22.2%)              | >0.99          |
| <i>CEBPA</i>  | 12 (6.28%)                      | 1 (11.1%)              | 0.46           |
| <i>NRAS</i>   | 15 (7.85%)                      | 0                      | >0.99          |
| <i>TET2</i>   | 16 (8.38%)                      | 1 (11.1%)              | 0.56           |
| <i>IDH1</i>   | 19 (9.95%)                      | 0                      | >0.99          |
| <i>IDH2</i>   | 20 (10.5%)                      | 0                      | 0.60           |
| <i>RUNX1</i>  | 16 (8.38%)                      | 1 (11.1%)              | 0.56           |
| <i>NPM1</i>   | 53 (27.7%)                      | 1 (11.1%)              | 0.45           |
| <i>WT1</i>    | 12 (6.28%)                      | 0                      | >0.99          |

**Table S6.** Molecular characteristics of patients with AML in the TCGA data set with available information on mutations in either or both Complex I and IV. *P-values calculated using non-parametric Mann-Whitney U or Fisher's Exact test.*

| <b>Gene</b>   | <b>No Mutations<br/>(n=188)</b> | <b>Mutations (n=12)</b> | <b><i>p-value</i></b> |
|---------------|---------------------------------|-------------------------|-----------------------|
| <i>FLT3</i>   | 55 (29.3%)                      | 1 (8.33%)               | 0.19                  |
| <i>TP53</i>   | 12 (6.38%)                      | 4 (33.3%)               | 0.009                 |
| <i>DNMT3A</i> | 46 (24.5%)                      | 3 (25%)                 | >0.99                 |
| <i>CEBPA</i>  | 12 (6.38%)                      | 1 (8.33%)               | 0.56                  |
| <i>NRAS</i>   | 15 (7.98%)                      | 0                       | 0.61                  |
| <i>TET2</i>   | 16 (8.51%)                      | 1 (8.33%)               | >0.99                 |
| <i>IDH1</i>   | 18 (13.3%)                      | 1 (8.33%)               | >0.99                 |
| <i>IDH2</i>   | 20 (13.8%)                      | 0                       | 0.61                  |
| <i>RUNX1</i>  | 16 (8.51%)                      | 1 (8.33%)               | >0.99                 |
| <i>NPM1</i>   | 52 (27.7%)                      | 2 (16.7%)               | 0.52                  |
| <i>WT1</i>    | 12 (6.38%)                      | 0                       | >0.99                 |

**Table S7.** Molecular characteristics of patients with AML in the TCGA data set with available information on mutation status in Complex I. *P-values calculated using non-parametric Mann-Whitney U or Fisher's Exact test.*

| <b>Gene</b>   | <b>No Mutations<br/>(n=196)</b> | <b>Mutations (n=4)</b> | <b><i>p-value</i></b> |
|---------------|---------------------------------|------------------------|-----------------------|
| <i>FLT3</i>   | 56 (28.6%)                      | 0                      | 0.58                  |
| <i>TP53</i>   | 15 (7.65%)                      | 1 (25%)                | 0.29                  |
| <i>DNMT3A</i> | 48 (24.5%)                      | 1                      | >0.99                 |
| <i>CEBPA</i>  | 13 (6.63%)                      | 0                      | >0.99                 |
| <i>NRAS</i>   | 15 (7.65%)                      | 0                      | >0.99                 |
| <i>TET2</i>   | 17 (8.67%)                      | 0                      | >0.99                 |
| <i>IDH1</i>   | 18 (12.8%)                      | 1 (25%)                | 0.33                  |
| <i>IDH2</i>   | 20 (13.8%)                      | 0                      | >0.99                 |
| <i>RUNX1</i>  | 16 (8.16%)                      | 1 (25%)                | 0.30                  |
| <i>NPM1</i>   | 53 (27.0%)                      | 1 (25%)                | >0.99                 |
| <i>WT1</i>    | 12 (6.12%)                      | 0                      | >0.99                 |



**Table S8.** Molecular characteristics of patients with AML in the TCGA data set with available information on mutation status in Complex III. *P-values calculated using non-parametric Mann-Whitney U or Fisher's Exact test.*

| <b>Gene</b>   | <b>No Mutations<br/>(n=197)</b> | <b>Mutations (n=3)</b> | <b>p-value</b> |
|---------------|---------------------------------|------------------------|----------------|
| <i>FLT3</i>   | 54 (27.4%)                      | 2 (66.7%)              | 0.19           |
| <i>TP53</i>   | 15 (7.61%)                      | 1 (33.3%)              | 0.22           |
| <i>DNMT3A</i> | 48 (24.4%)                      | 1 (33.3%)              | 0.57           |
| <i>CEBPA</i>  | 12 (6.09%)                      | 1 (33.3%)              | 0.18           |
| <i>NRAS</i>   | 15 (7.61%)                      | 0                      | >0.99          |
| <i>TET2</i>   | 17 (8.63%)                      | 0                      | >0.99          |
| <i>IDH1</i>   | 19 (9.64%)                      | 0                      | >0.99          |
| <i>IDH2</i>   | 19 (9.64%)                      | 1 (33.3%)              | 0.27           |
| <i>RUNX1</i>  | 17 (8.63%)                      | 0                      | >0.99          |
| <i>NPM1</i>   | 53 (26.9%)                      | 1 (33.3%)              | >0.99          |
| <i>WT1</i>    | 12 (6.09%)                      | 0                      | >0.99          |

### OS in Old Patients (Age $\geq 60$ )

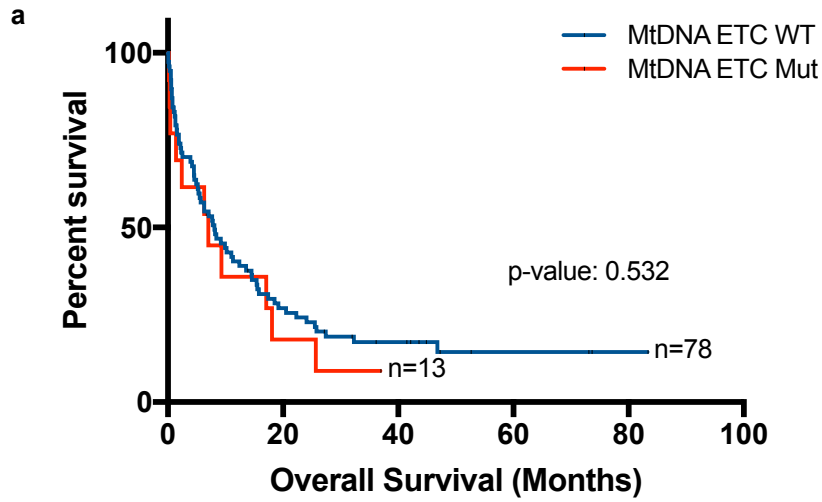

### OS in Young Patients (Age $< 60$ )

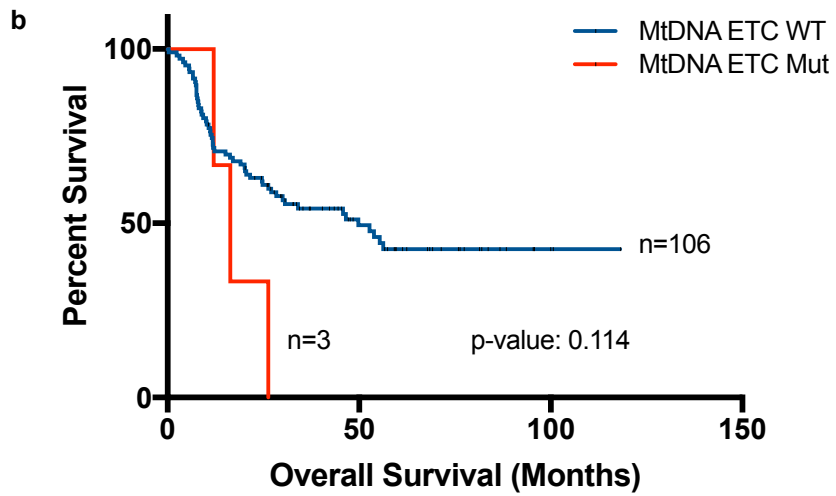

**Fig S1.** Kaplan-Meier Survival Curves for ETC gene mutations in AML after age-stratification. Overall survival in (a) old (age  $\geq 60$ ) and (b) young (age  $< 60$ ) patients with and without mitochondrial ETC gene mutations.
